# Supplementary material
Source: publisher site journal article supplement (https://www.dovepress.com/article/573618)
Supplement: Supplementary file 1 [file 573618_Supplementary_2.docx]

Table S1. GOLD-based disease diagnosis criteria

| Type | Diagnosis criteria |
| --- | --- |
| COPD | FEV1/FVC < 0.7 |
| PRISm | FEV1/FVC ≥ 0.7 and FEV1 (or FVC) < 80 % predicted |
| Normal | FEV1/FVC ≥ 0.7 and FEV1(or FVC) ≥ 80 % predicted |

Table S2. Data for encoder develope

|  | Normal (n=130) | PRISm (n=47) | COPD(n=987) | P value |
| --- | --- | --- | --- | --- |
| Man/ female, n (%) | 73/57  (56.2%/43.8%) | 25/22  (53.2%/46.8%) | 688/299 (69.7%/30.3%) | ＜0.001 |
| Age, year | 62.6±11 | 64.2±12.5 | 67.9±10.7 | ＜0.001 |
| Height, cm | 164.8±7.7 | 164.2±8.8 | 164.9±8.3 | 0.831 |
| Weight, kg | 68.7±11 | 71.2±11.8 | 67.8±12.3 | 0.141 |
| Never/former/current smokers, n(%) | 87/16/27 (66.9%/12.3%/20.8%) | 29/9/9  (61.7%/19.1/19.1%) | 520/246/221  (52.7%/24.9%/22.4) | 0.01 |
| FEV1 | 2.5±0.5 | 1.7±0.5 | 1.4±0.6 | ＜0.001 |
| FVC | 3.2±0.7 | 2.3±0.7 | 2.5±0.8 | ＜0.001 |
| FEV1/FVC | 0.8±0 | 0.8±0 | 0.5±0.1 | ＜0.001 |
| FEV1%pred | 1±0.1 | 0.7±0.1 | 0.6±0.2 | ＜0.001 |
| FVC%pred | 1±0.1 | 0.7±0.1 | 0.8±0.2 | ＜0.001 |

Table S3. Data for PulmoClass-3DAtt develope

|  | Normal (n=252) | PRISm (n=127) | COPD(n=375) | P value |
| --- | --- | --- | --- | --- |
| Man/ female, n (%) | 145/107  (57.5%/42.5%) | 83/44  (65.4%/34.6%) | 257/118  (68.5%/31.5) | 0.018 |
| Age, year | 61±11.3 | 65.1±13.1 | 67.9±10.3 | ＜0.001 |
| Height, cm | 165.7±8.3 | 165.8±7.8 | 165±8.3 | 0.449 |
| Weight, kg | 69.8±11.5 | 69.5±13.1 | 67.6±11 | 0.037 |
| Never/former/current smokers, n(%) | 162/36/54 (64.3%/14.3%/21.4%) | 75/26/26 (59.1%/20.5%/20.5%) | 197/96/82 (52.5%/25.6%/21.9%) | 0.011 |
| FEV1 | 2.6±0.6 | 1.8±0.5 | 1.4±0.6 | ＜0.001 |
| FVC | 3.4±0.8 | 2.4±0.7 | 2.5±0.8 | ＜0.001 |
| FEV1/FVC | 0.8±0.1 | 0.8±0.1 | 0.5±0.1 | ＜0.001 |
| FEV1%pred | 1±0.1 | 0.7±0.1 | 0.6±0.2 | ＜0.001 |
| FVC%pred | 1±0.1 | 0.7±0.1 | 0.8±0.2 | ＜0.001 |
